# Supplementary material for: Advancing Adverse Drug Reaction Prediction with Deep Chemical Language Model for Drug Safety Evaluation
Source: MDPI journal article supplement (doi:10.3390/ijms25084516), 2024-04-20
Supplement: s1 [file s1]

fluvastatin sodium

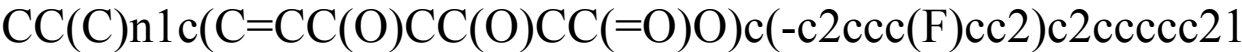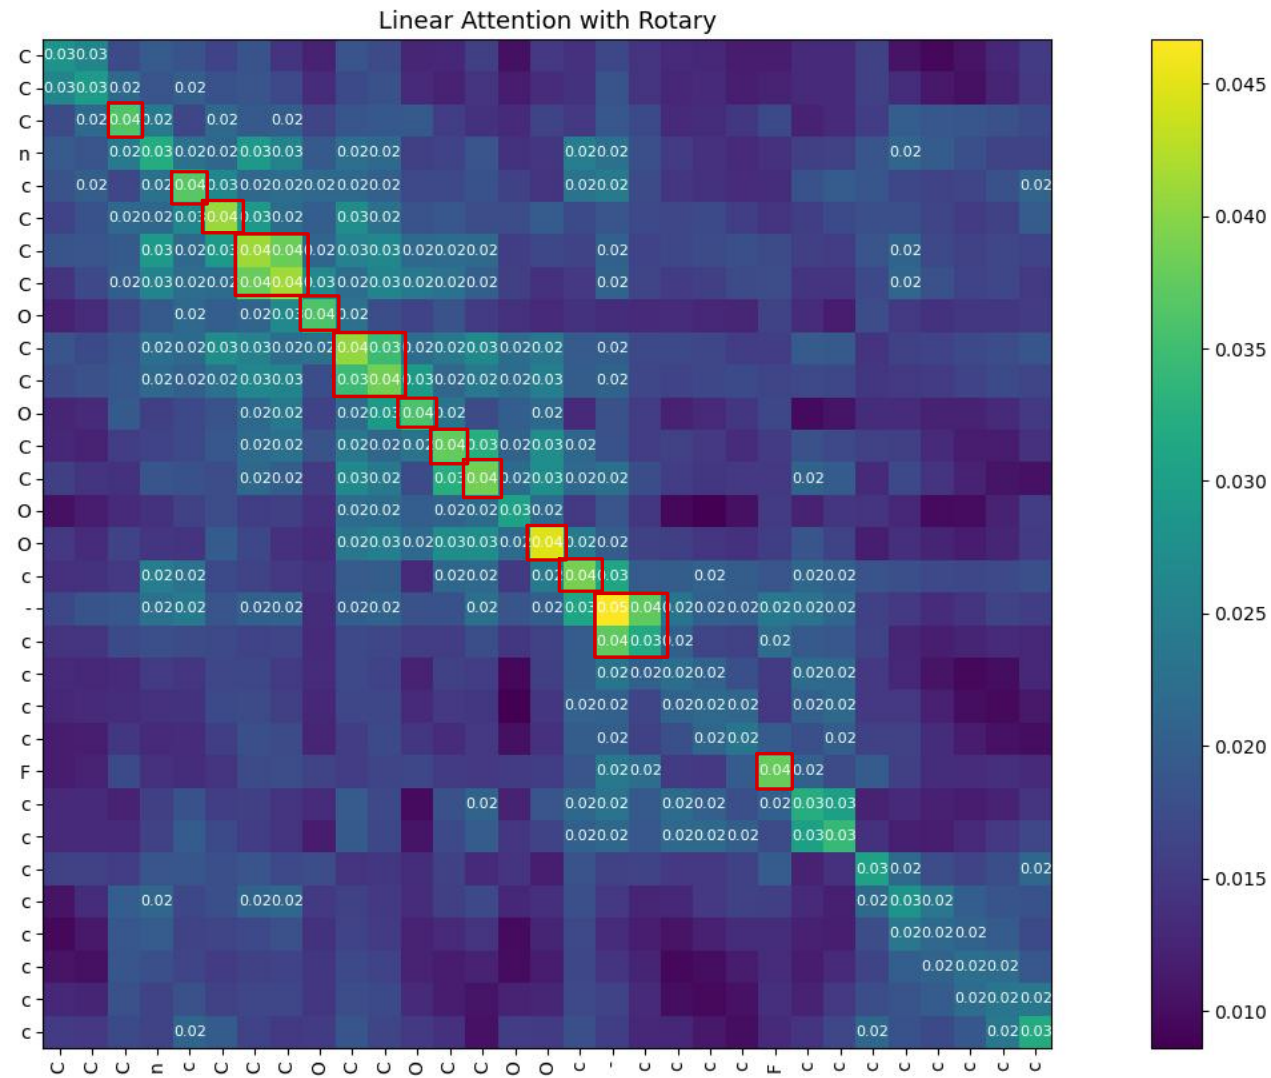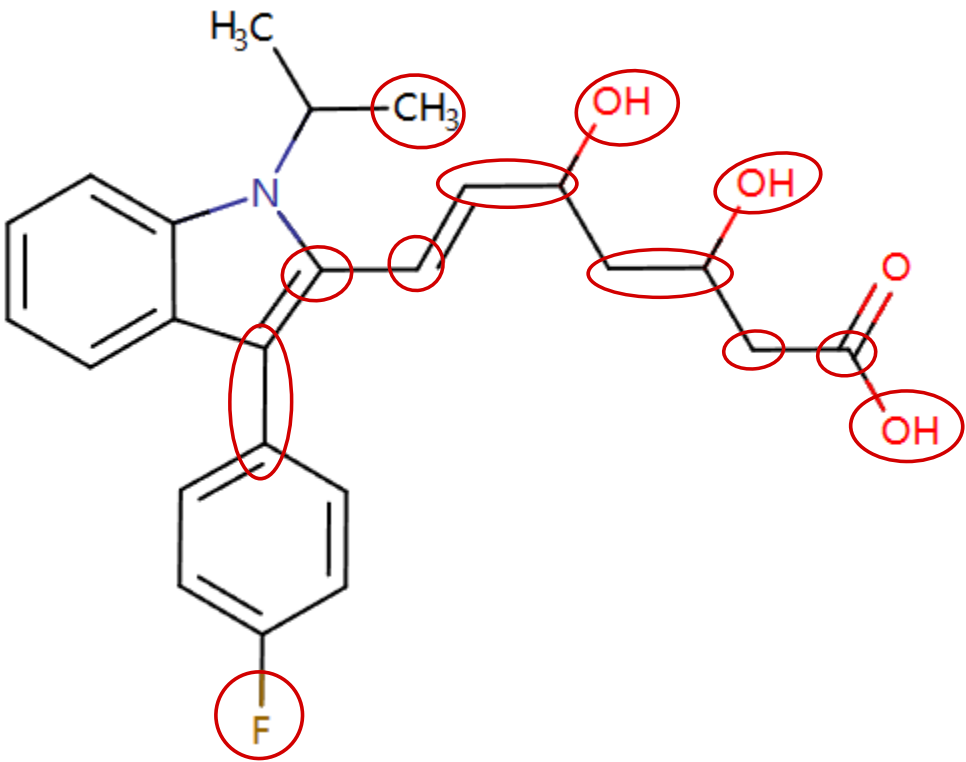

lovastatin

CCC(C)C(=O)OC1CC(C)C=C2C=CC(C)C(CCC3CC(O)CC(=O)O3)C21

Linear Attention with Rotary

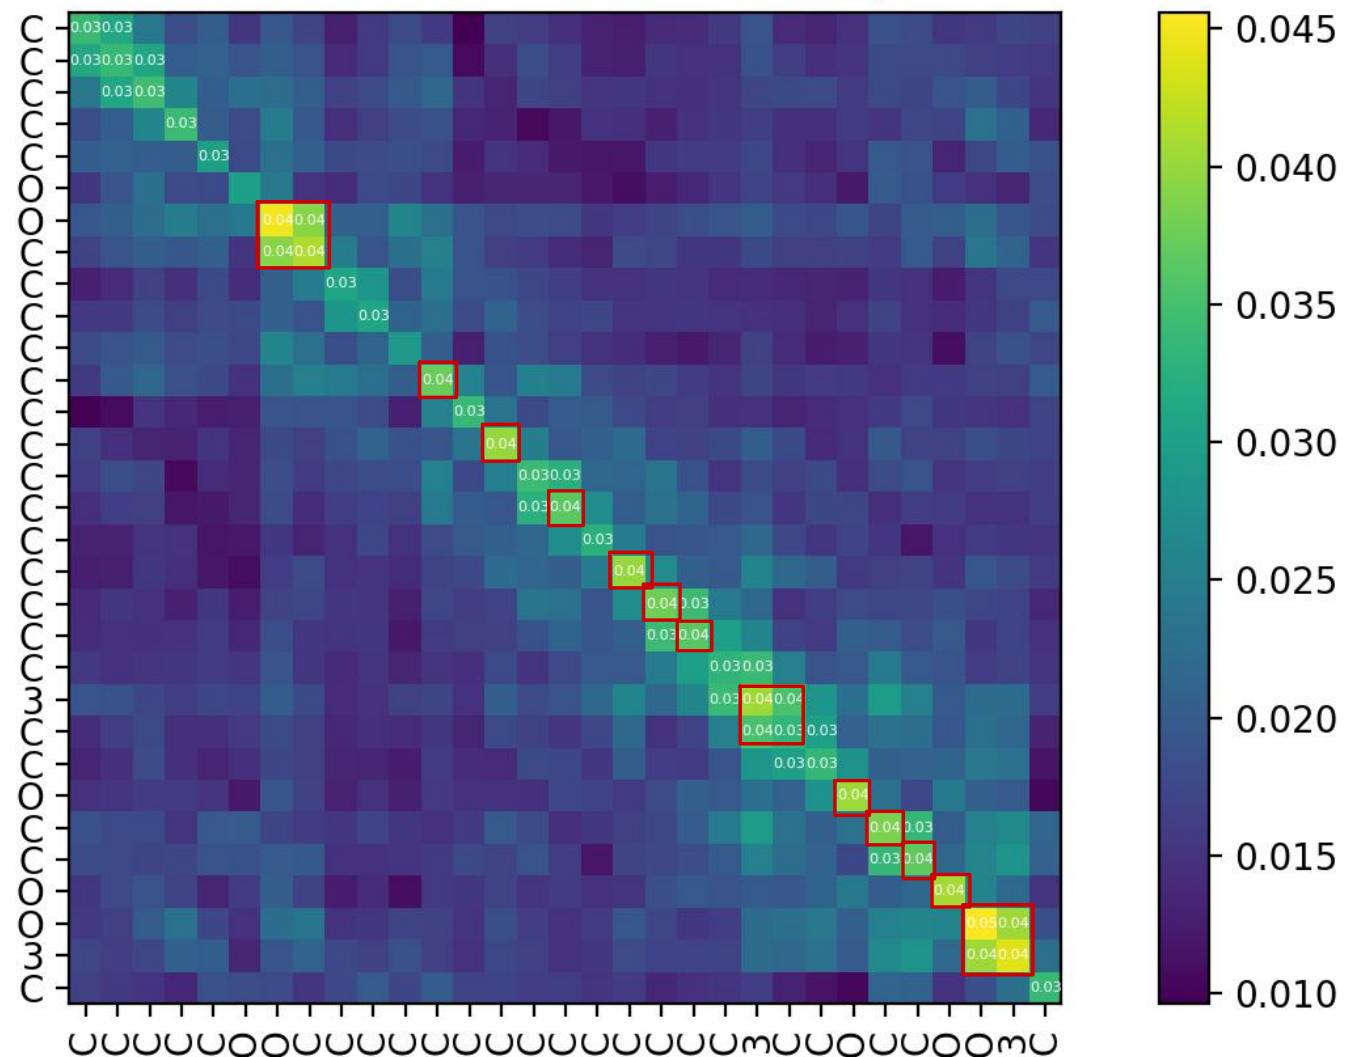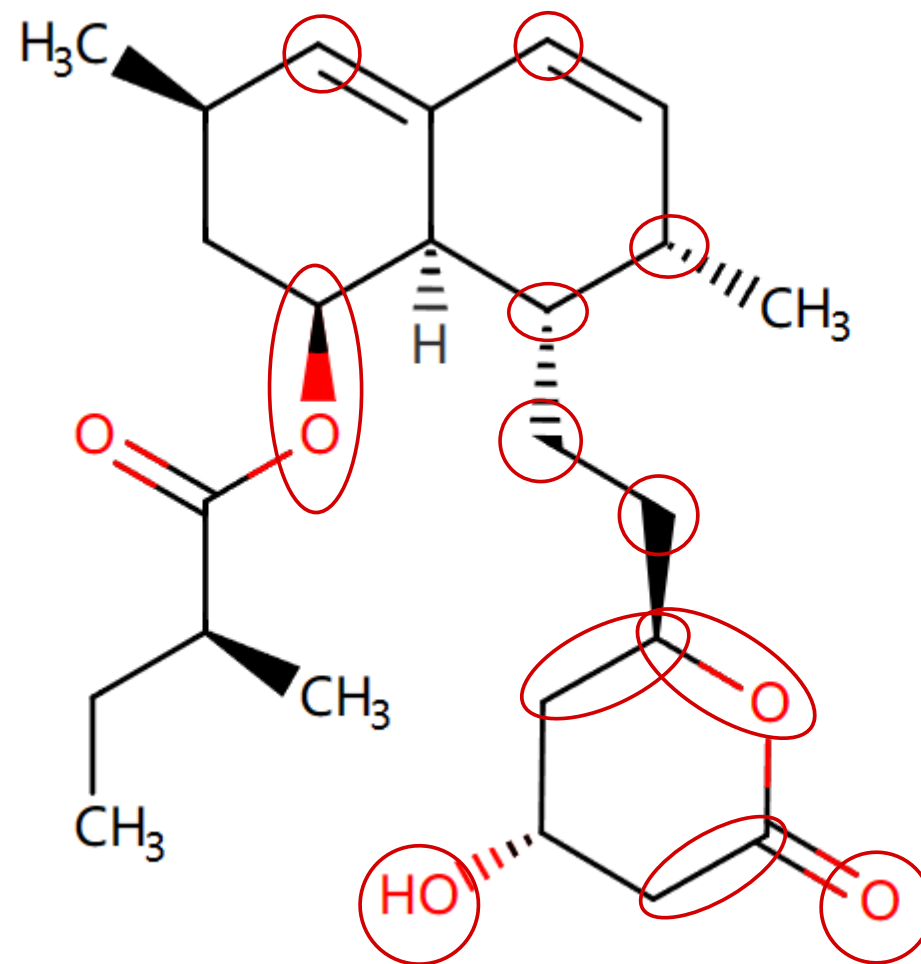

0.05-0.04

pravastatin sodium

CCC(C)C(=O)OC1CC(O)C=C2C=CC(C)C(CCC(O)CC(O)CC(=O)O)C21

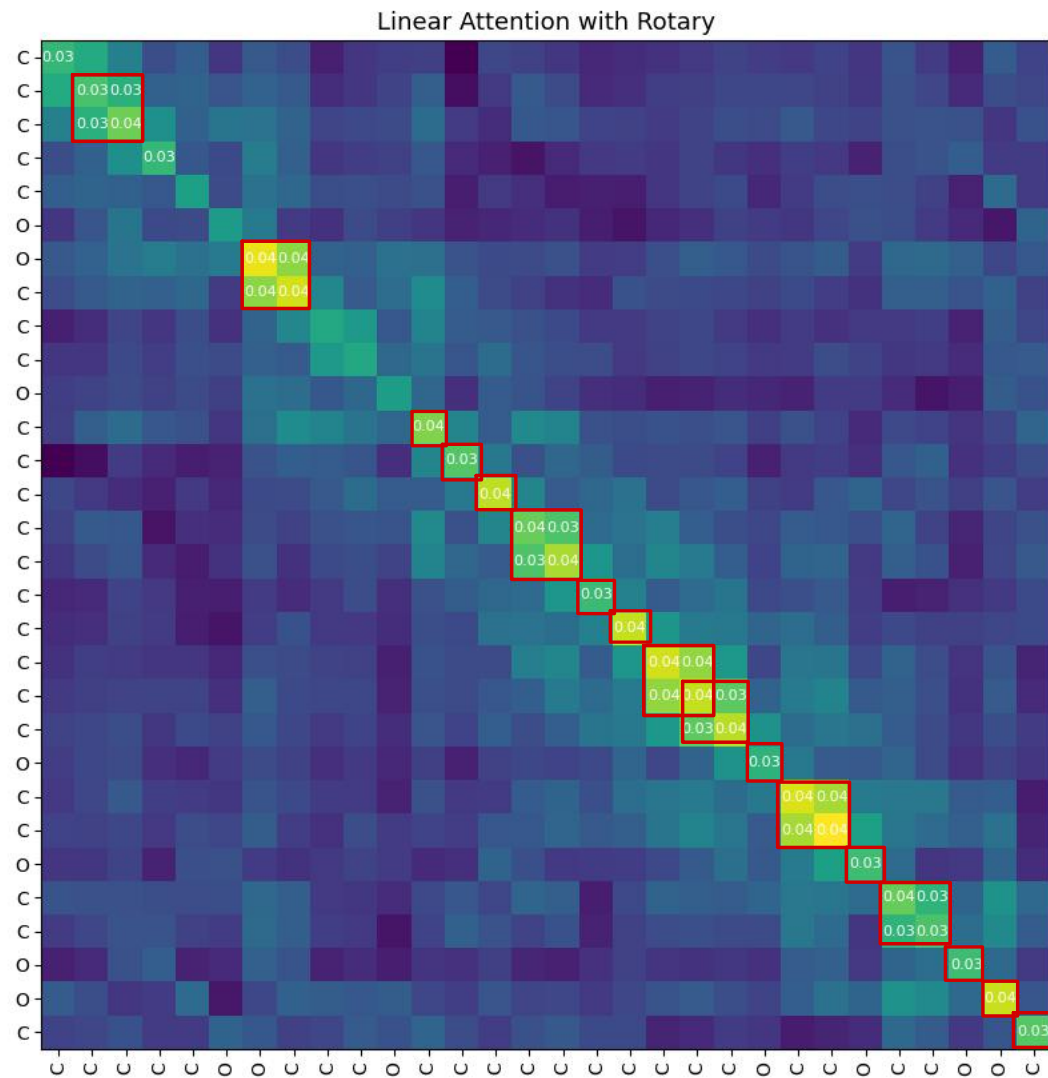

# atorvastatin calcium

CC(C)c1c(C(=O)Nc2ccccc2)c(-c2ccccc2)c(-c2ccc(F)cc2)n1CCC(O)CC(O)CC(=O)O

## Linear Attention with Rotary

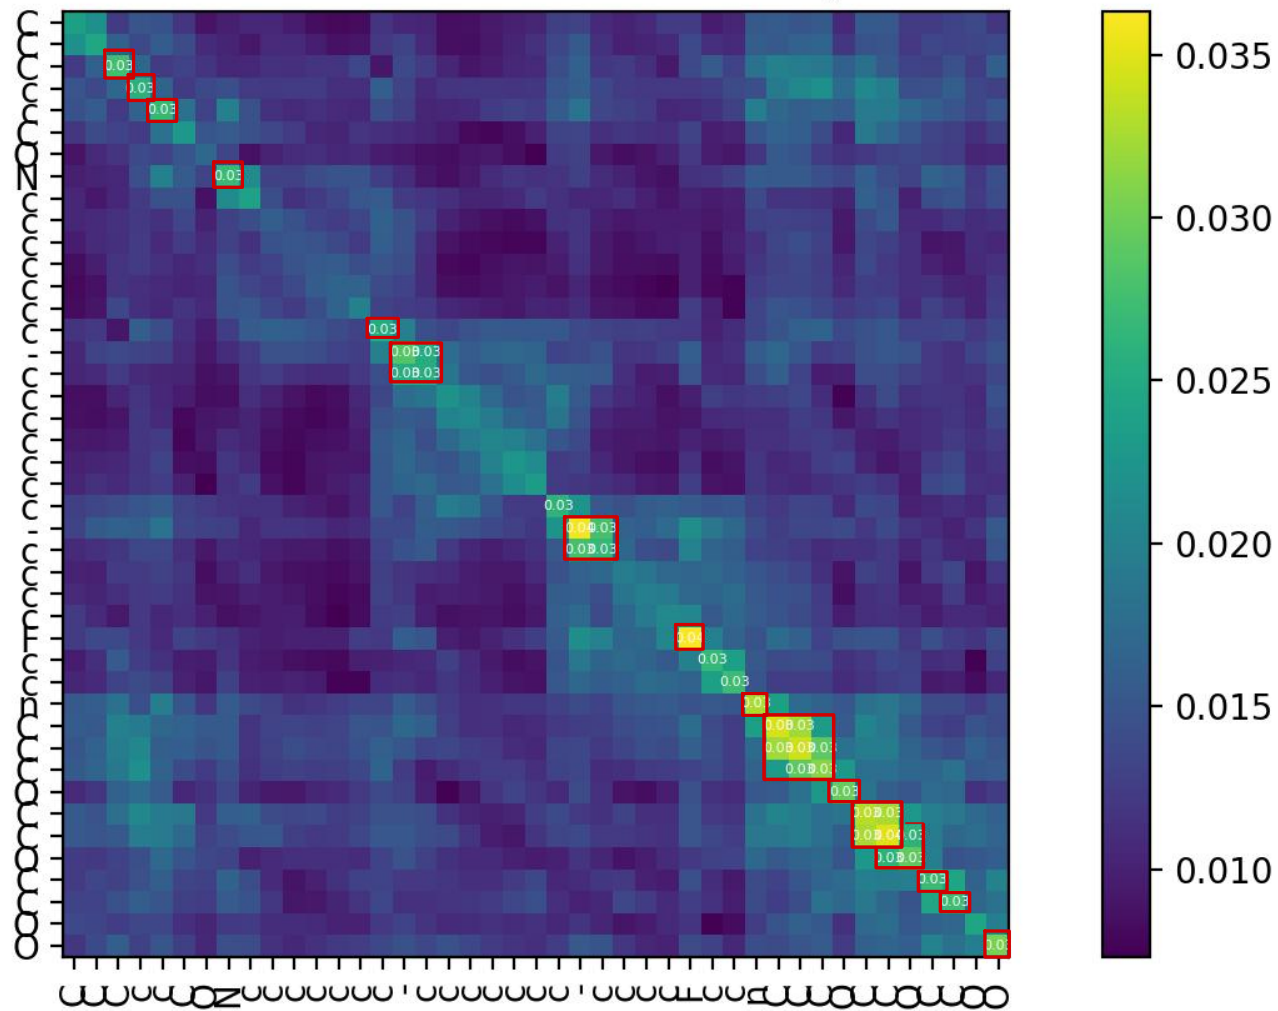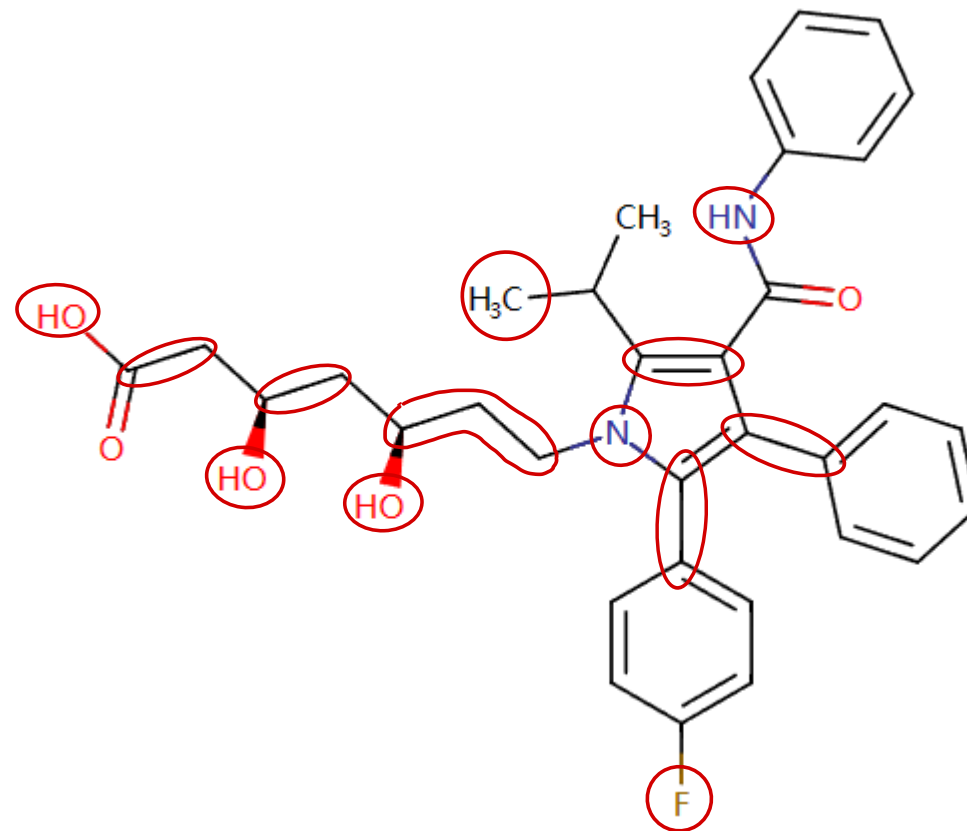

0.04-0.03



CC(C)c1nc(N(C)S(C)(=O)=O)nc(-c2ccc(F)cc2)c1C=CC(O)CC(O)CC(=O)O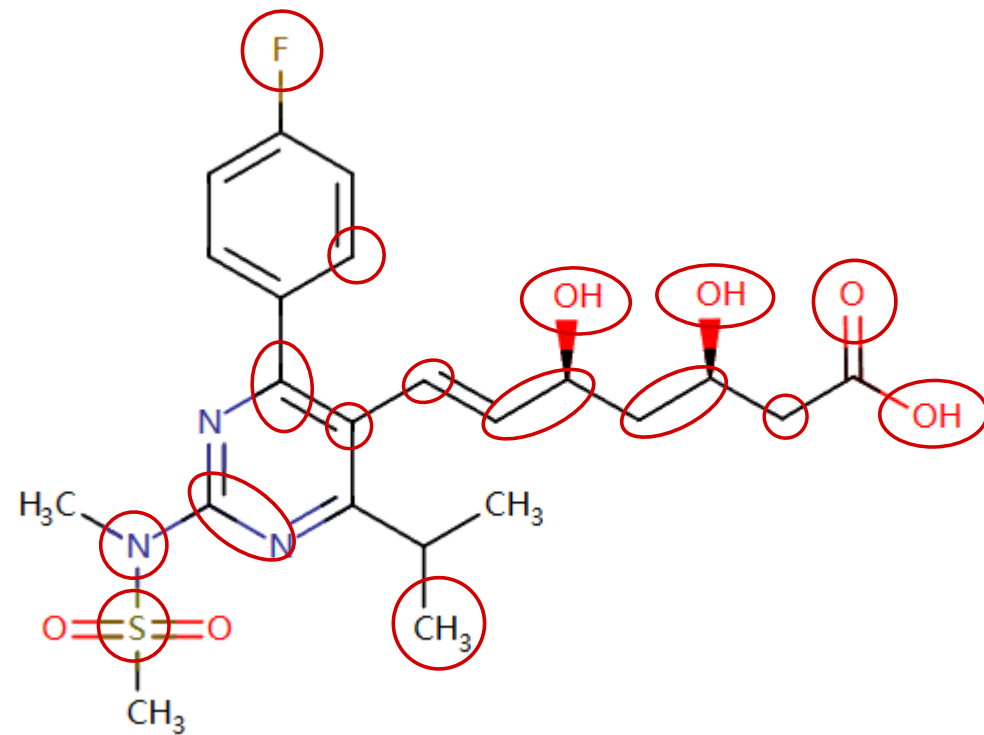

0.04-0.03

pitavastatin calcium

O=C(O)CC(O)CC(O)C=Cc1c(C2CC2)nc2ccccc2c1-c1ccc(F)cc1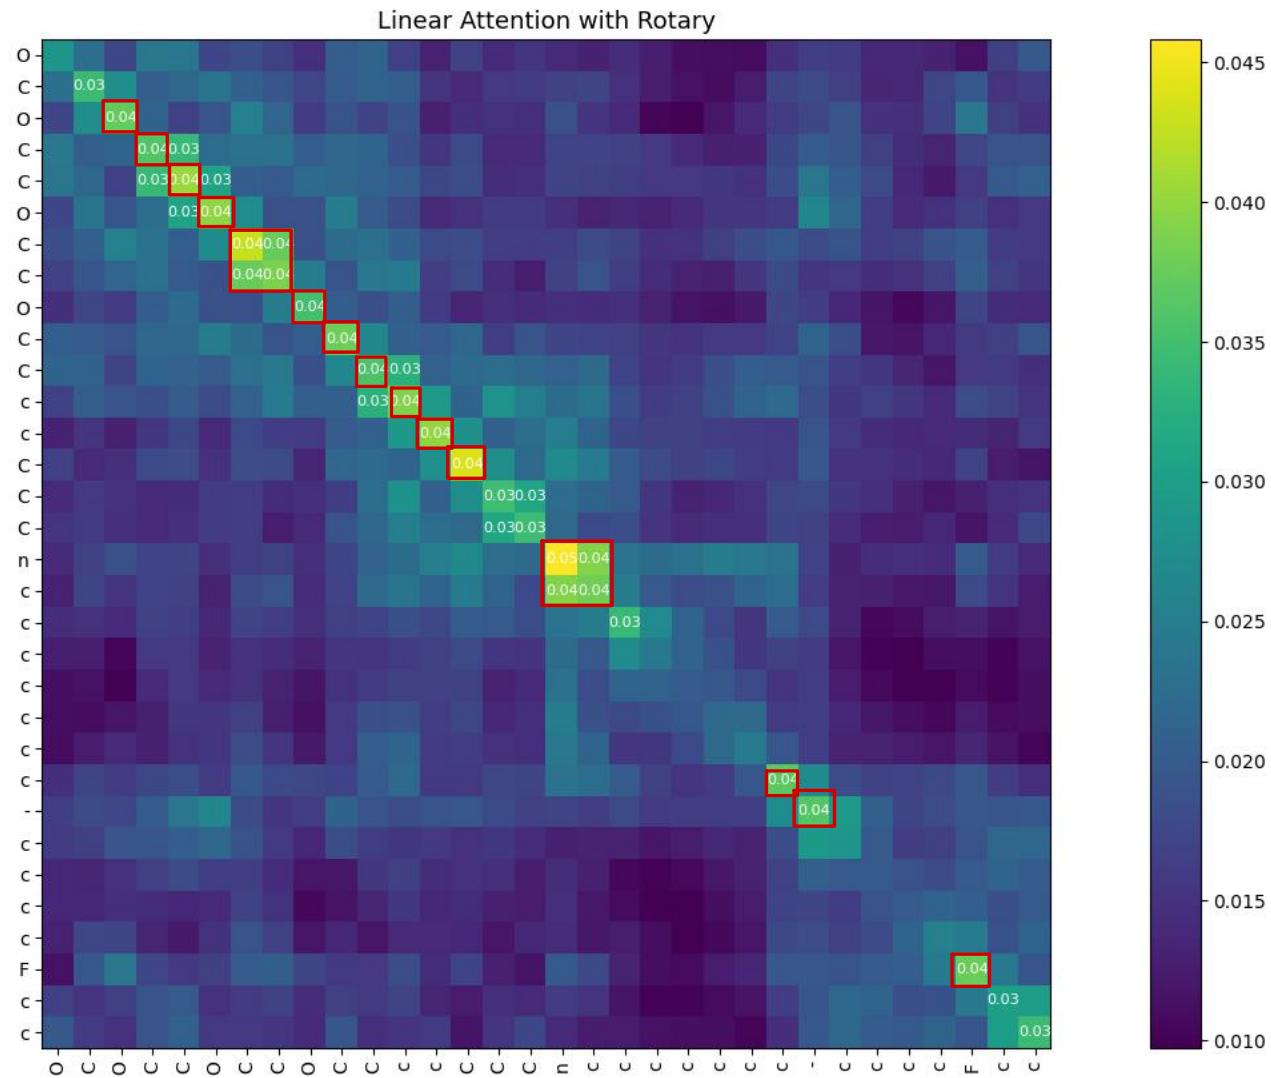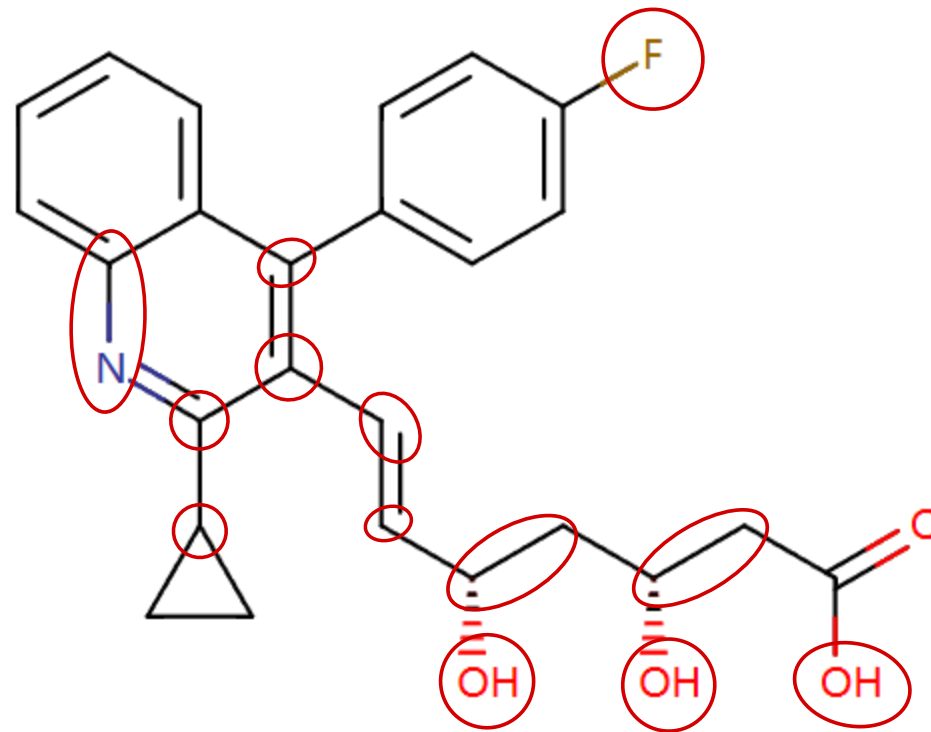

0.05-0.04

simvastatin

CCC(C)(C)C(=O)OC1CC(C)C=C2C=CC(C)C(CCC3CC(O)CC(=O)O3)C21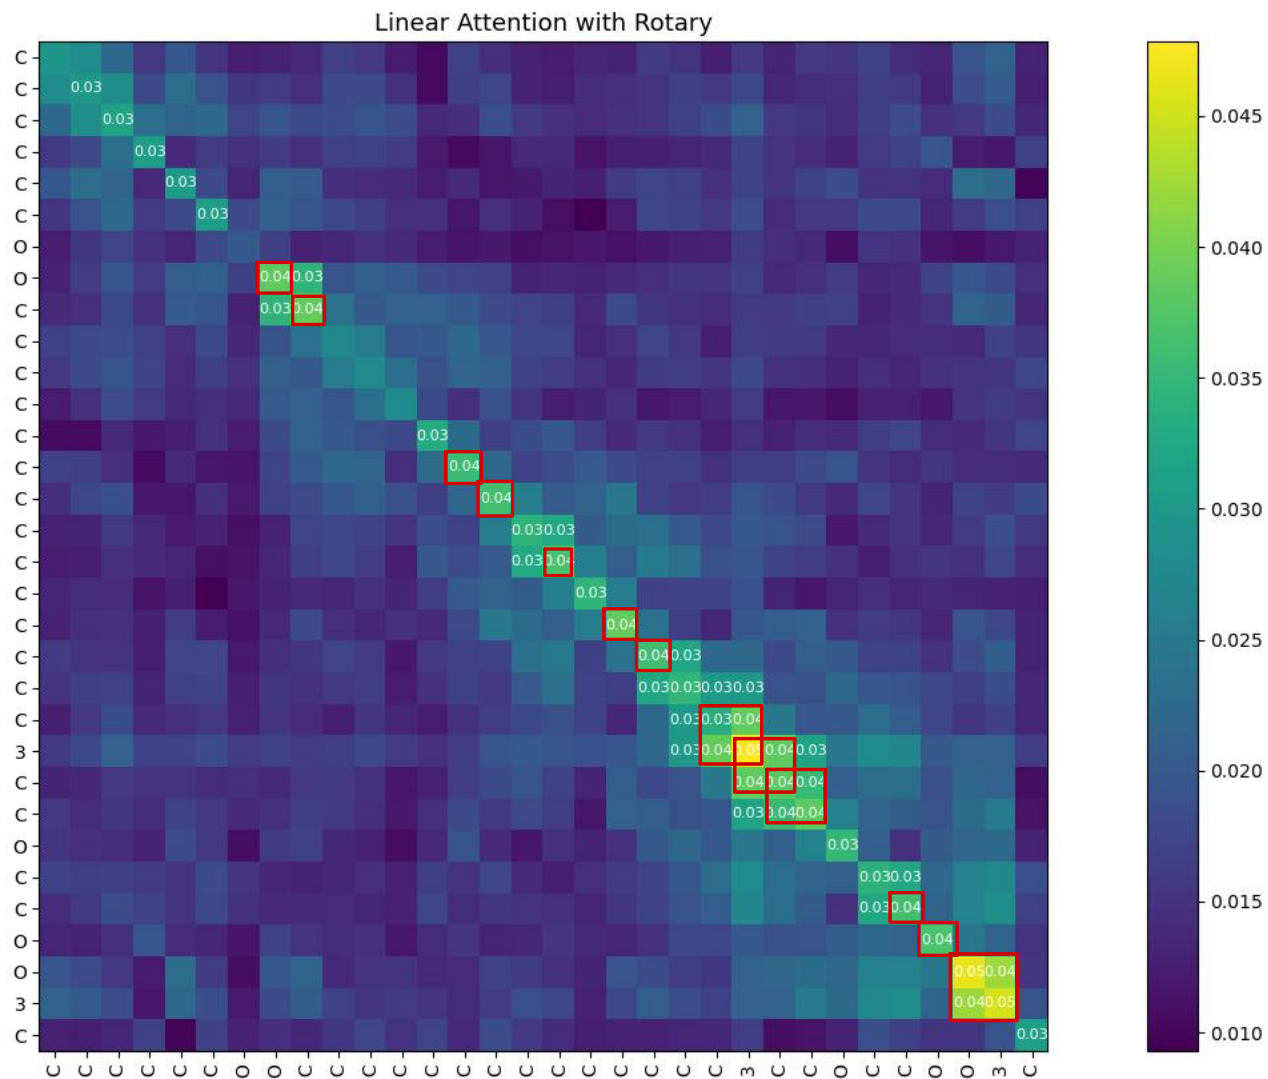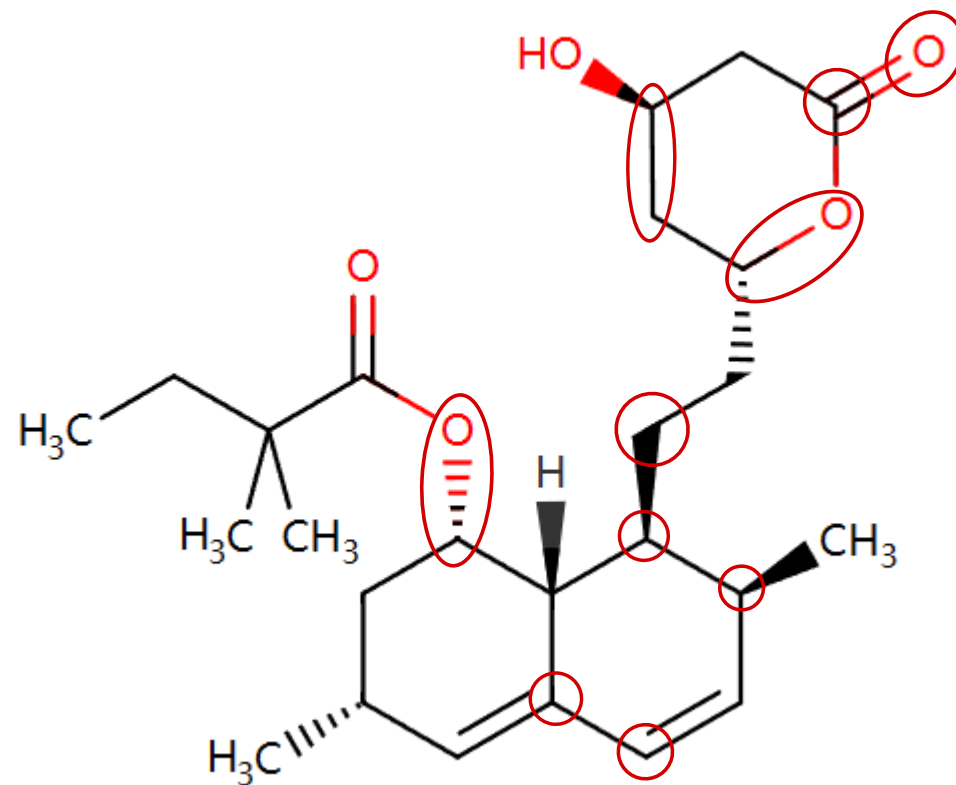

0.05-0.04
