# Supplementary material for: Advancing Adverse Drug Reaction Prediction with Deep Chemical Language Model for Drug Safety Evaluation
Source: MDPI journal article supplement (doi:10.3390/ijms25084516), 2024-04-20

QUINIDINE GLUCONATE

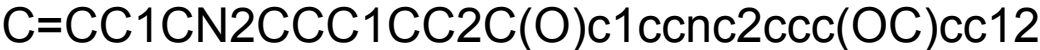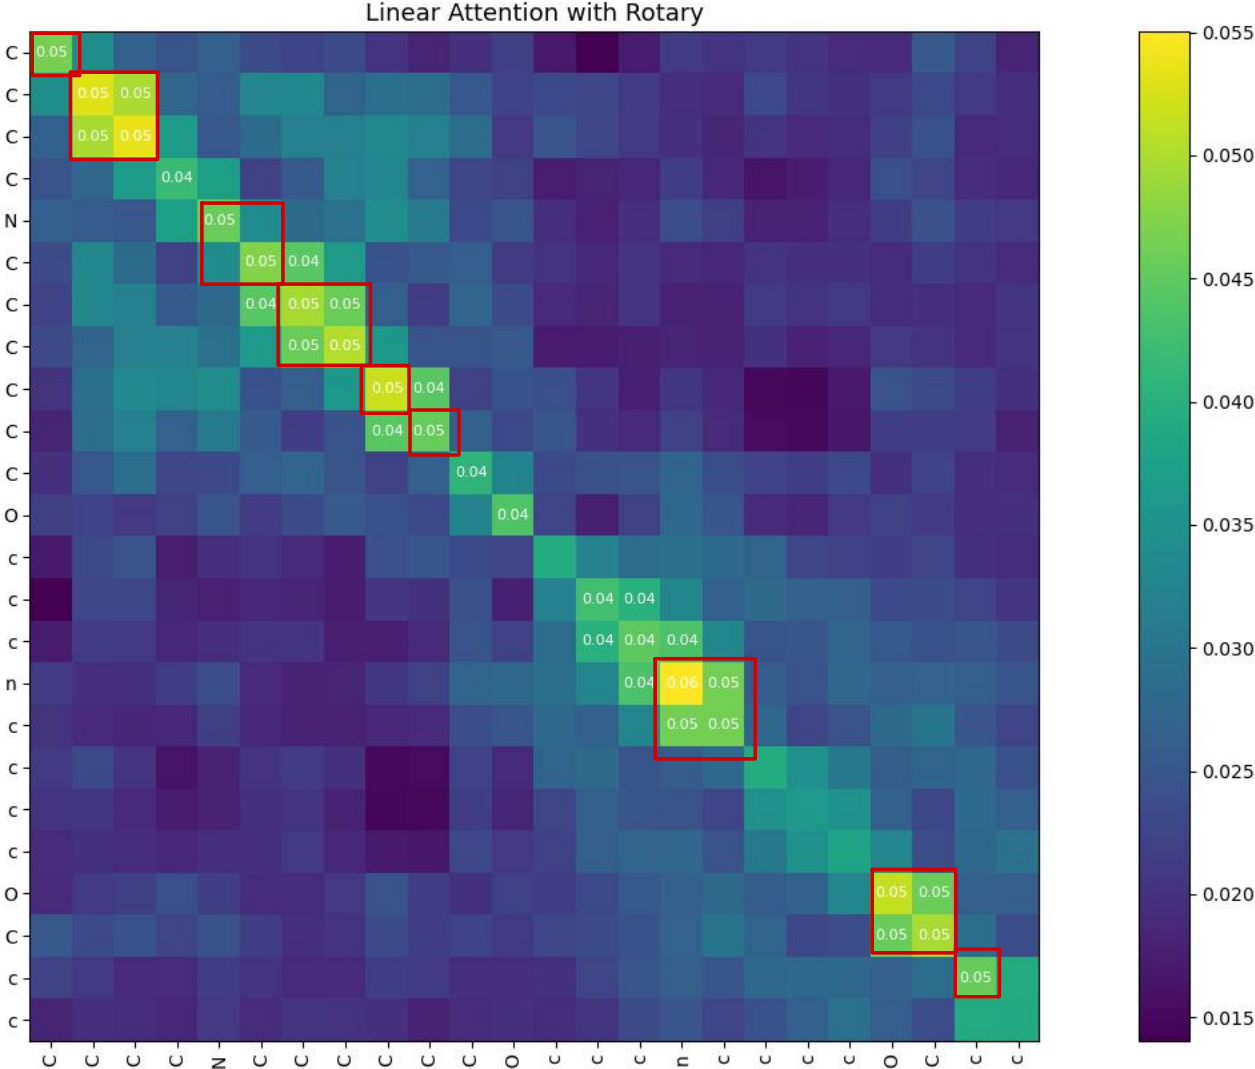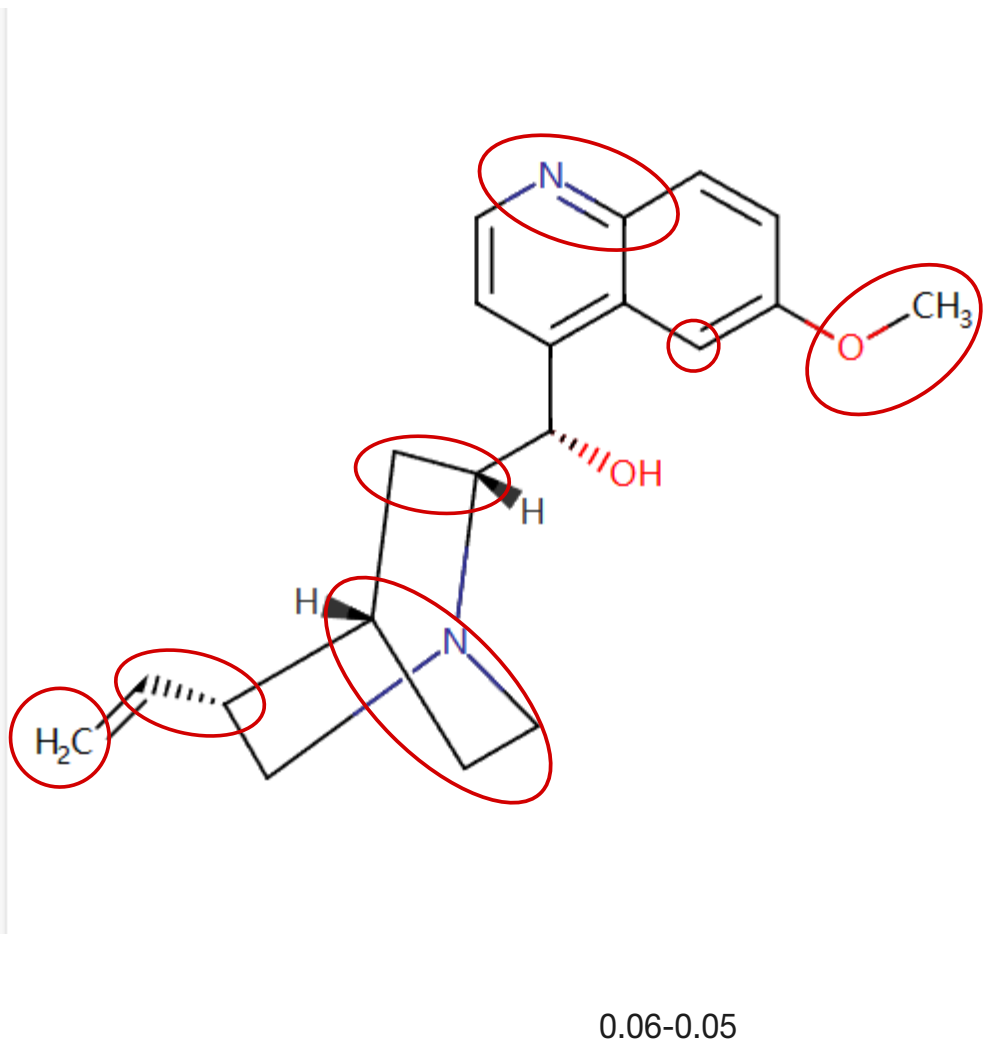

VANDETANIB

COc1cc2c(Nc3ccc(Br)cc3F)ncnc2cc1OCC1CCN(C)CC1

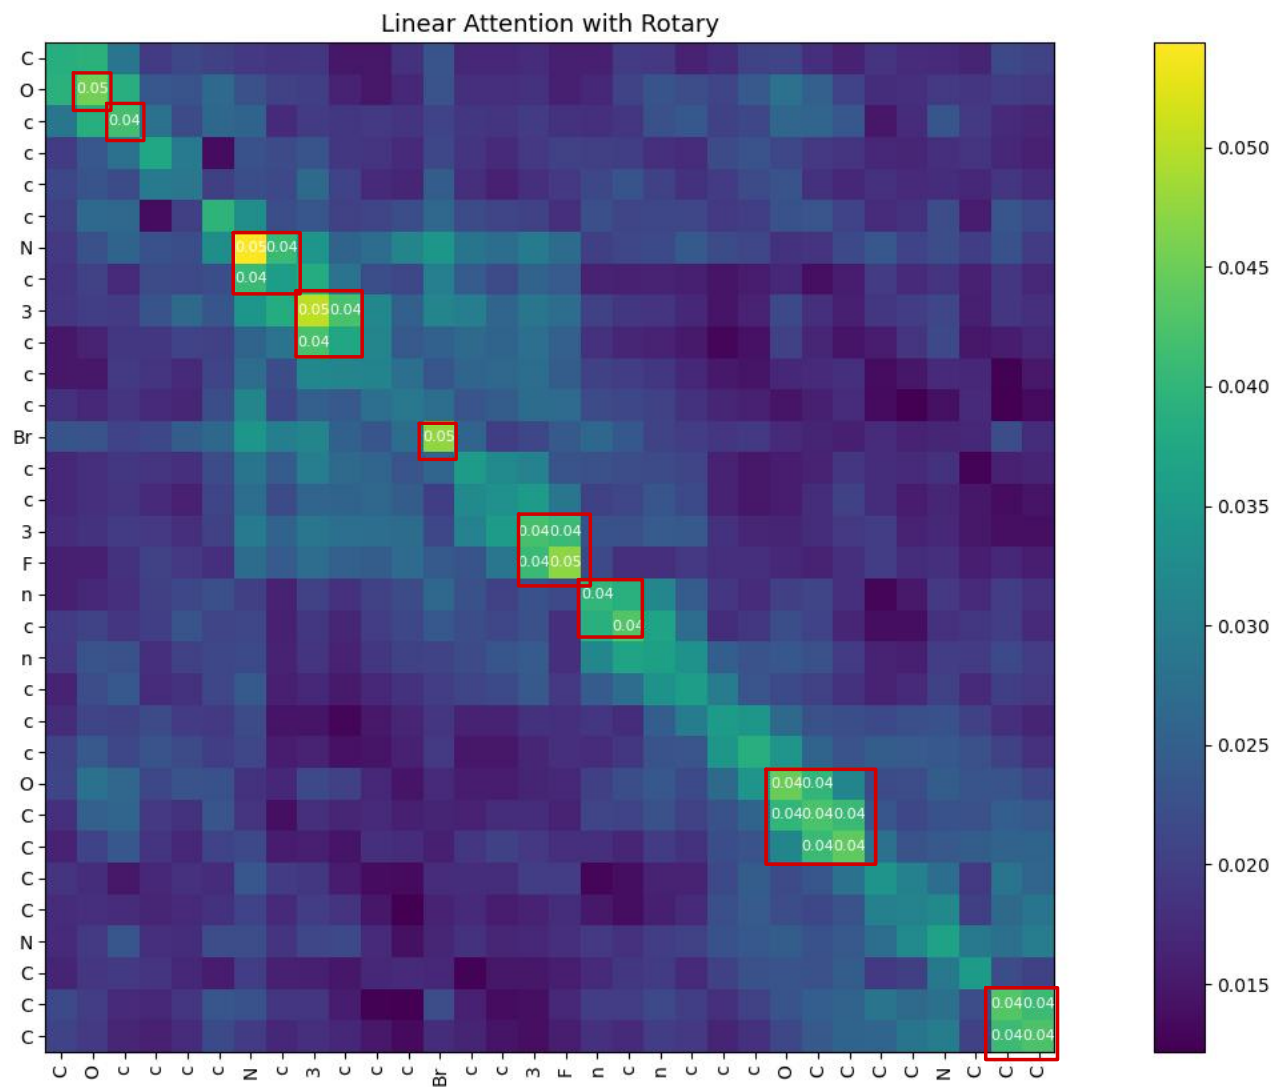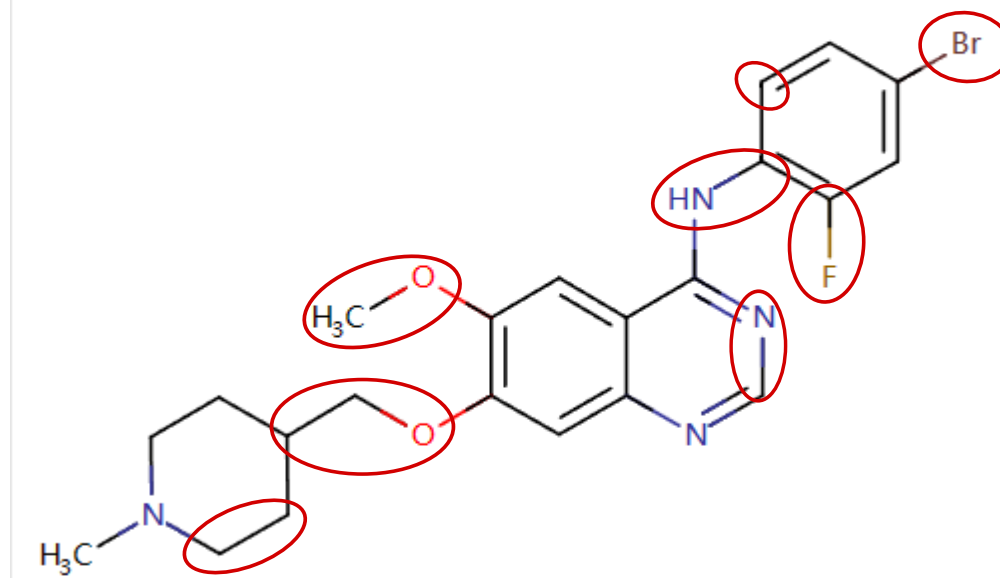

0.05-0.04

# IBUTILIDE FUMARATE

CCCCCCN(CC)CCCC(O)c1ccc(NS(C)(=O)=O)cc1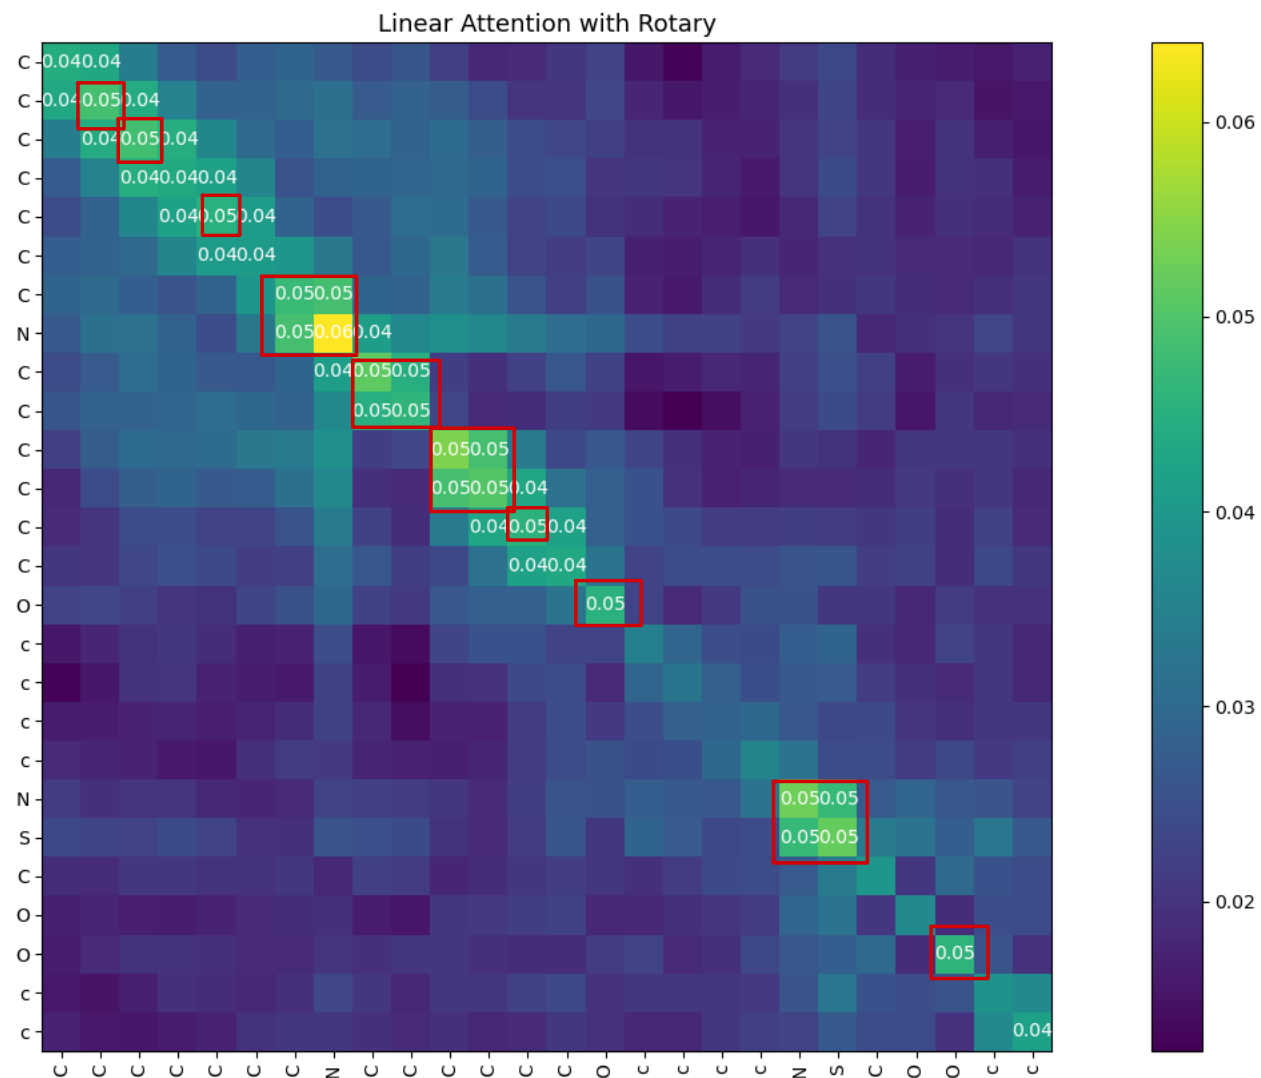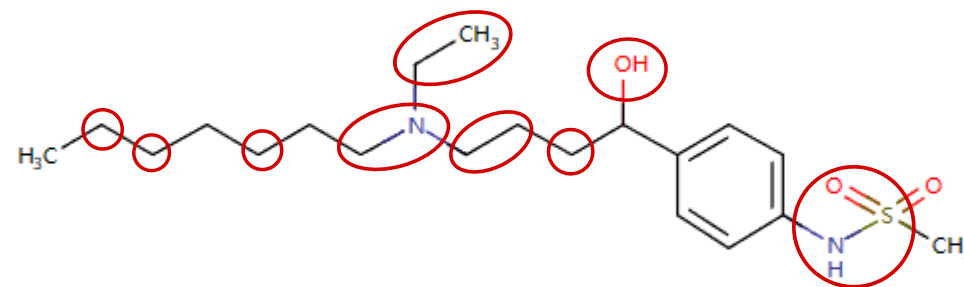

0.06-0.05

# DOFETILIDE

CN(CCOc1ccc(NS(C)(=O)=O)cc1)CCc1ccc(NS(C)(=O)=O)cc1

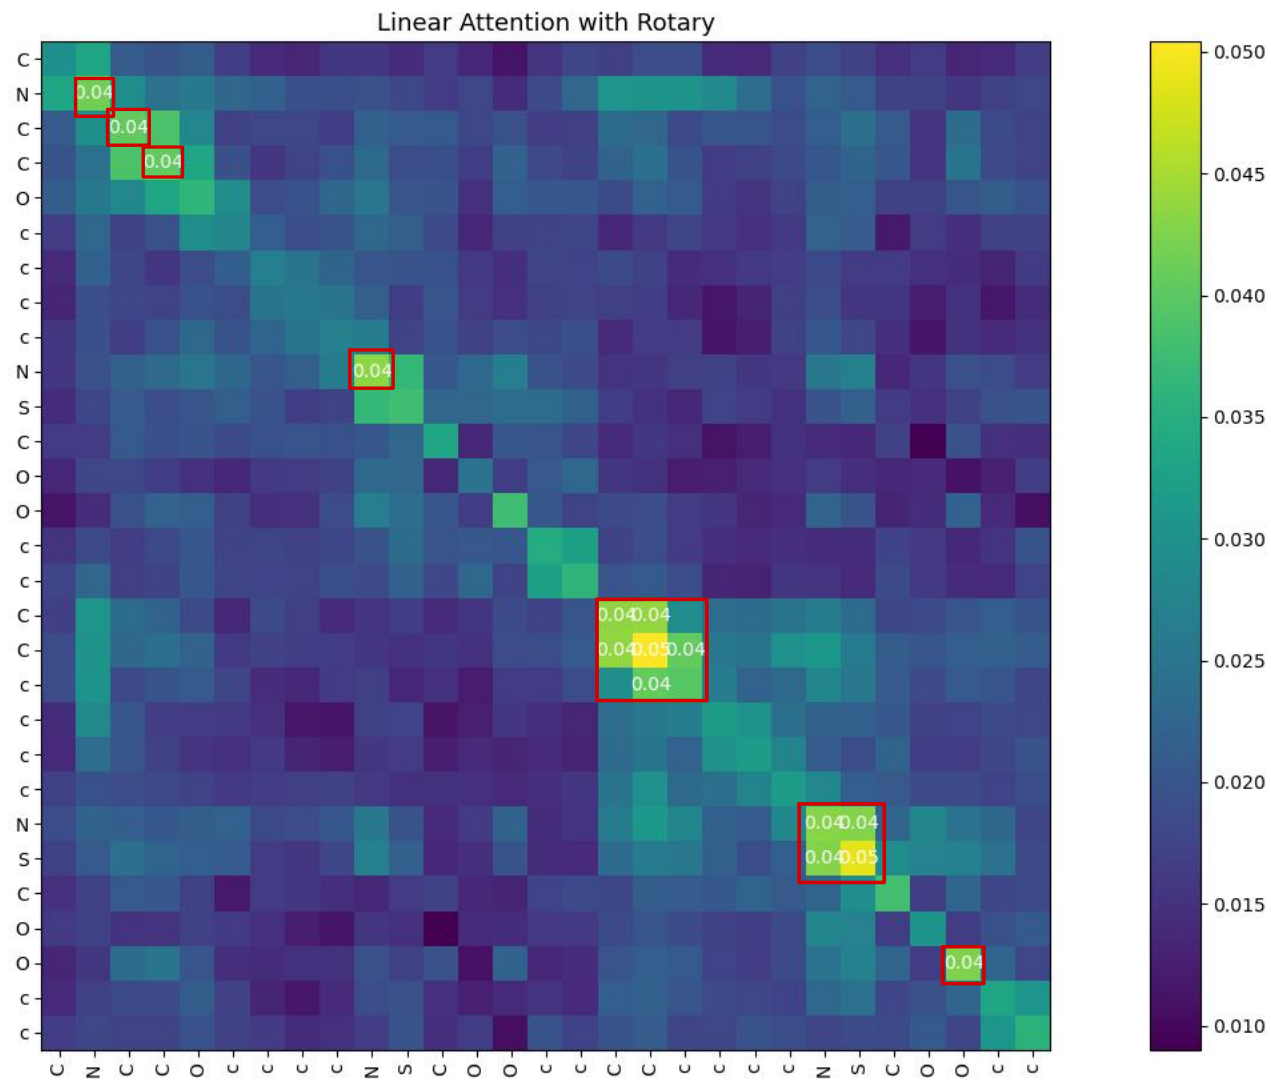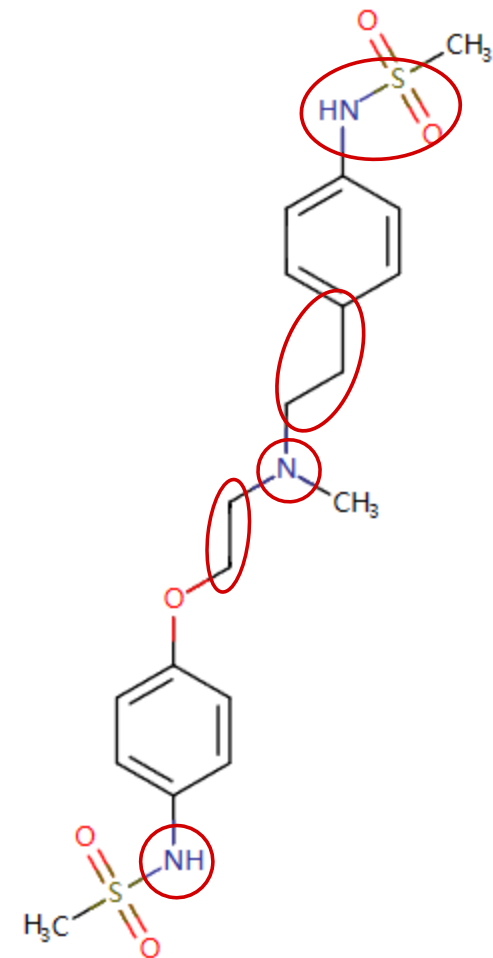

DISOPYRAMIDE PHOSPHATE

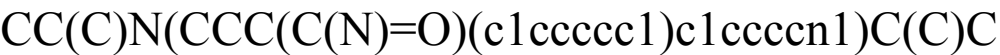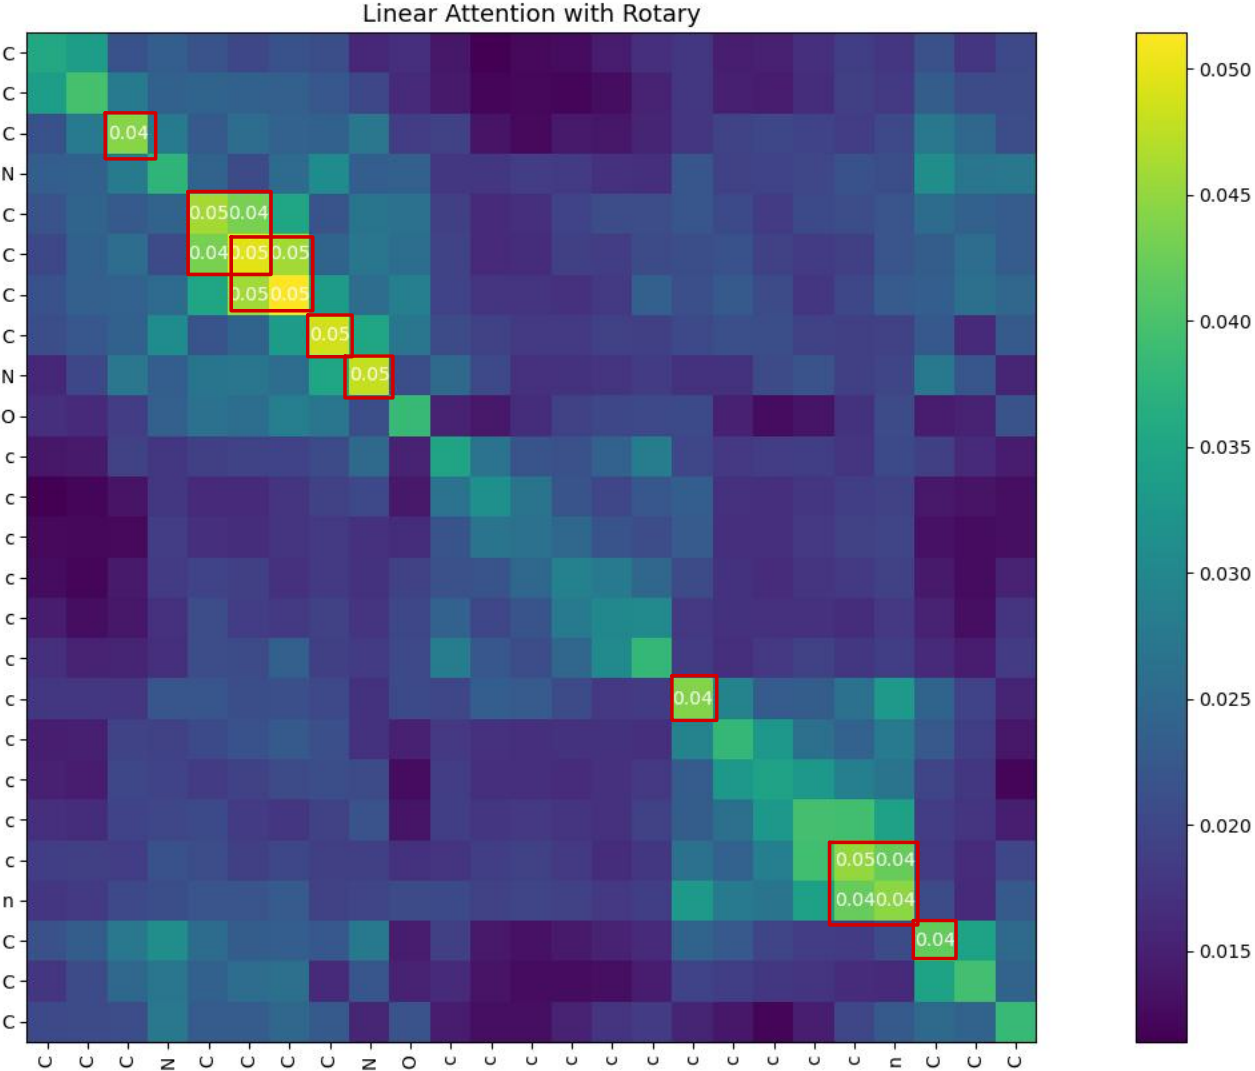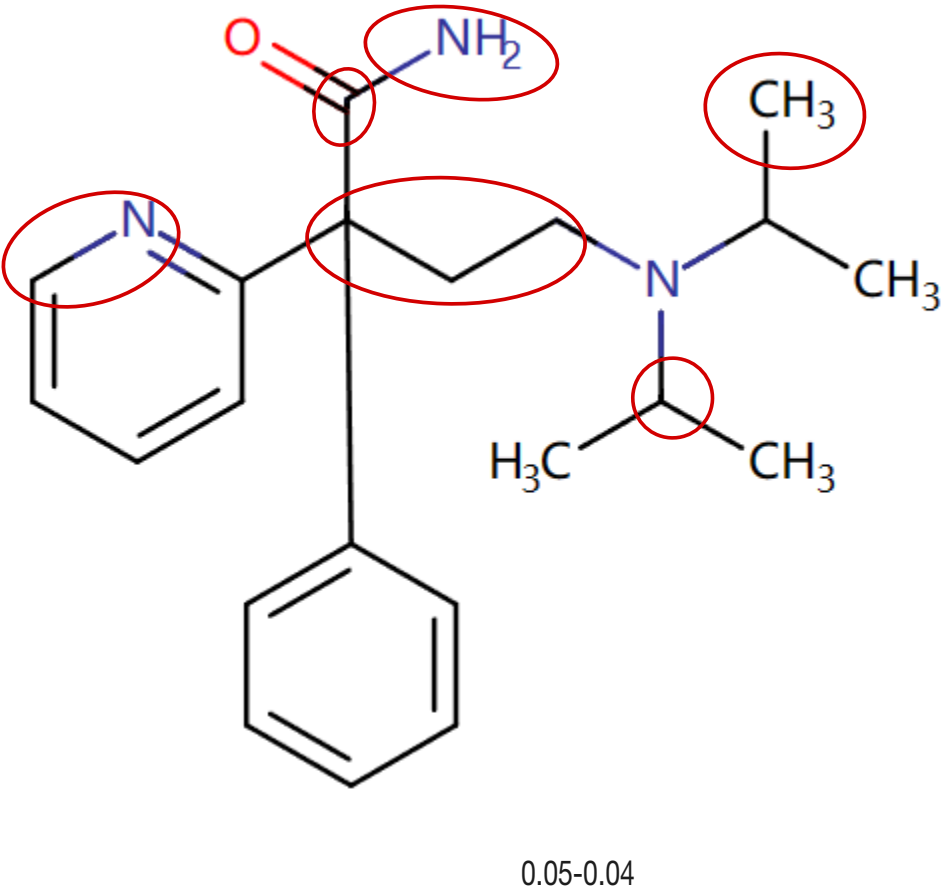

Supplement: s1 [file s1]
