# Supplementary figures and images for: Advancing Adverse Drug Reaction Prediction with Deep Chemical Language Model for Drug Safety Evaluation
Source: MDPI journal article supplement (doi:10.3390/ijms25084516), 2024-04-20

phenytoin

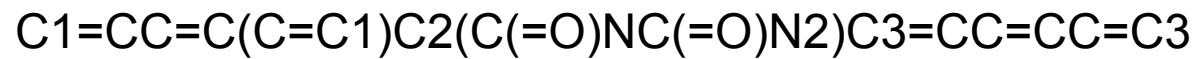

Linear Attention with Rotary

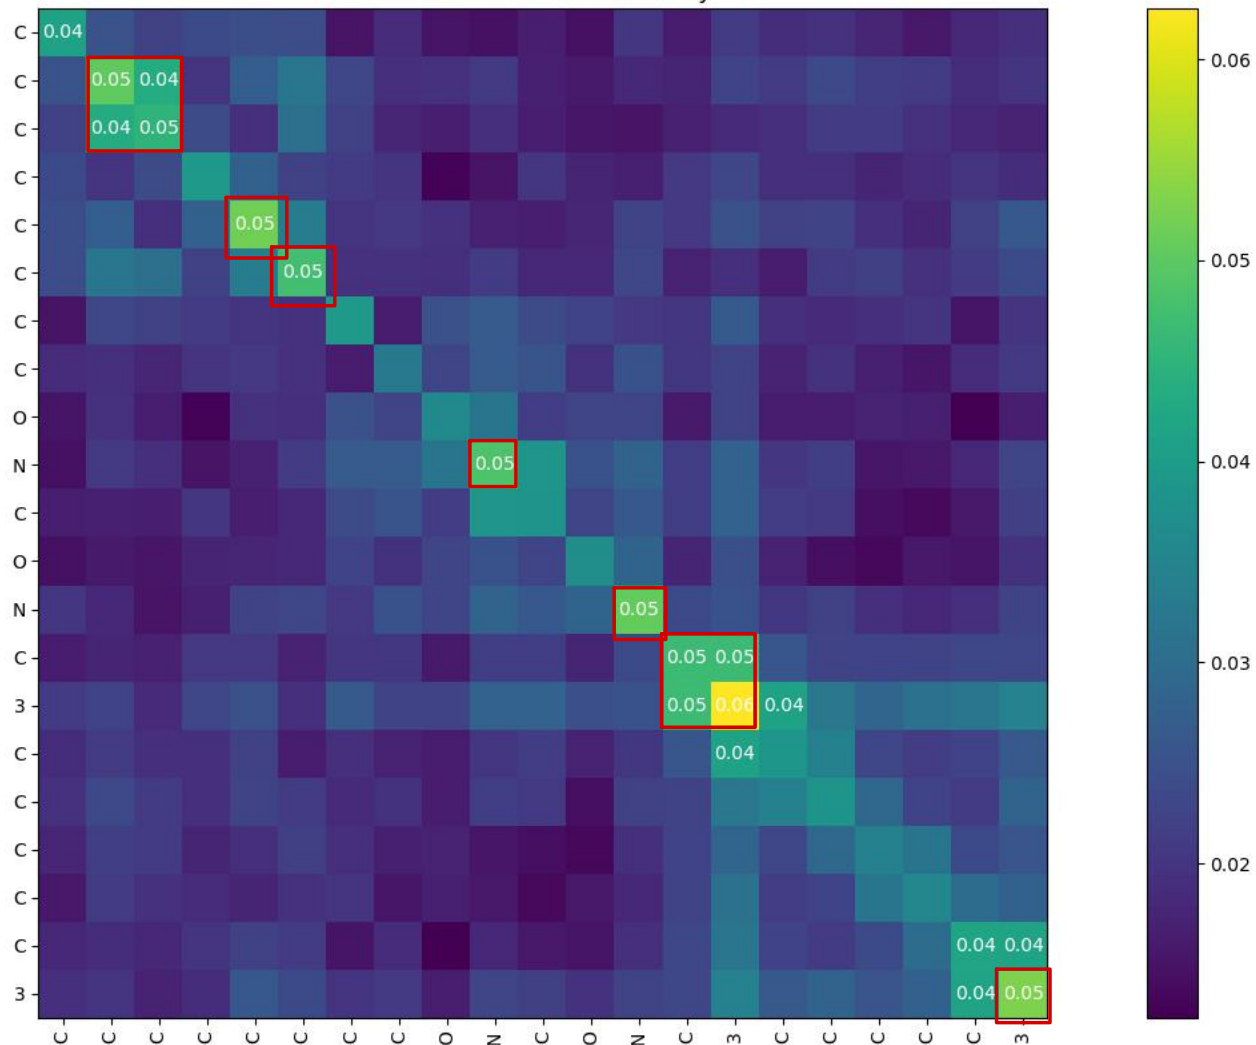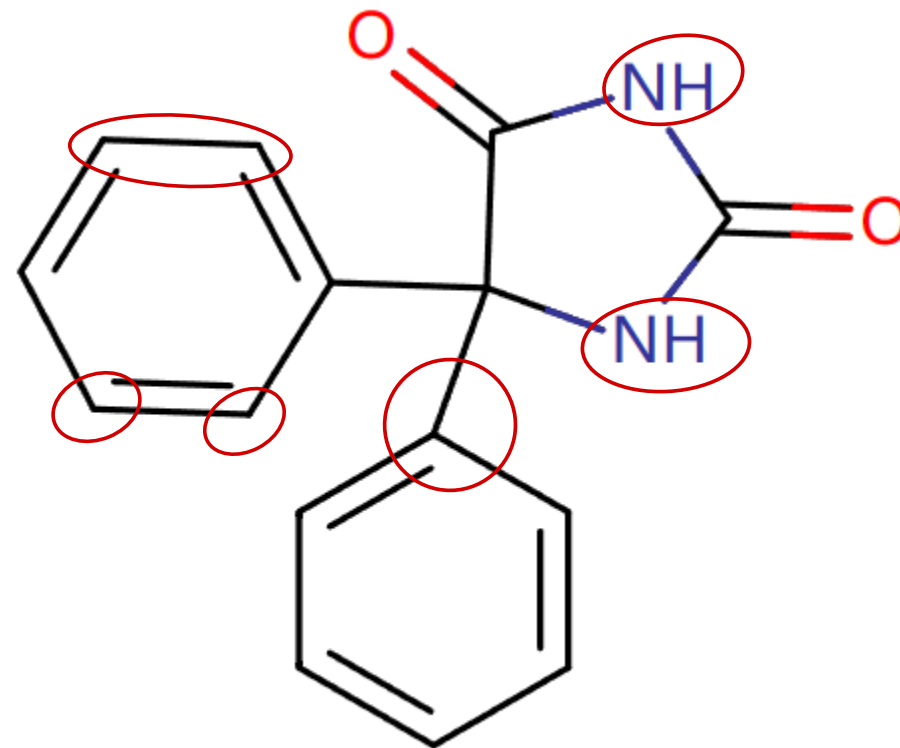

0.06-0.05

valproate

CCCC(CCC)C(=O)O

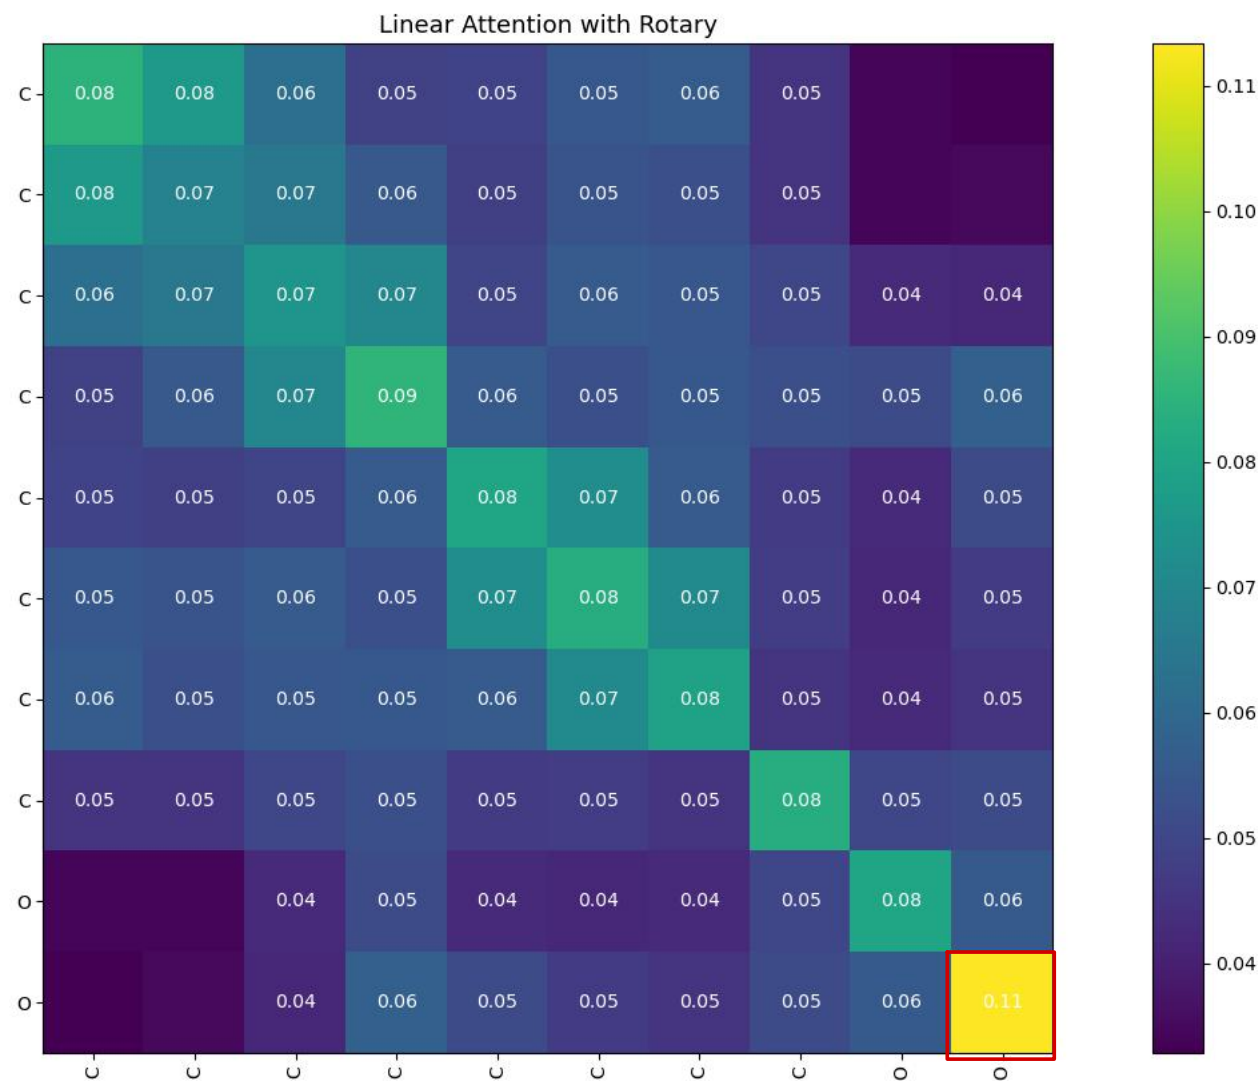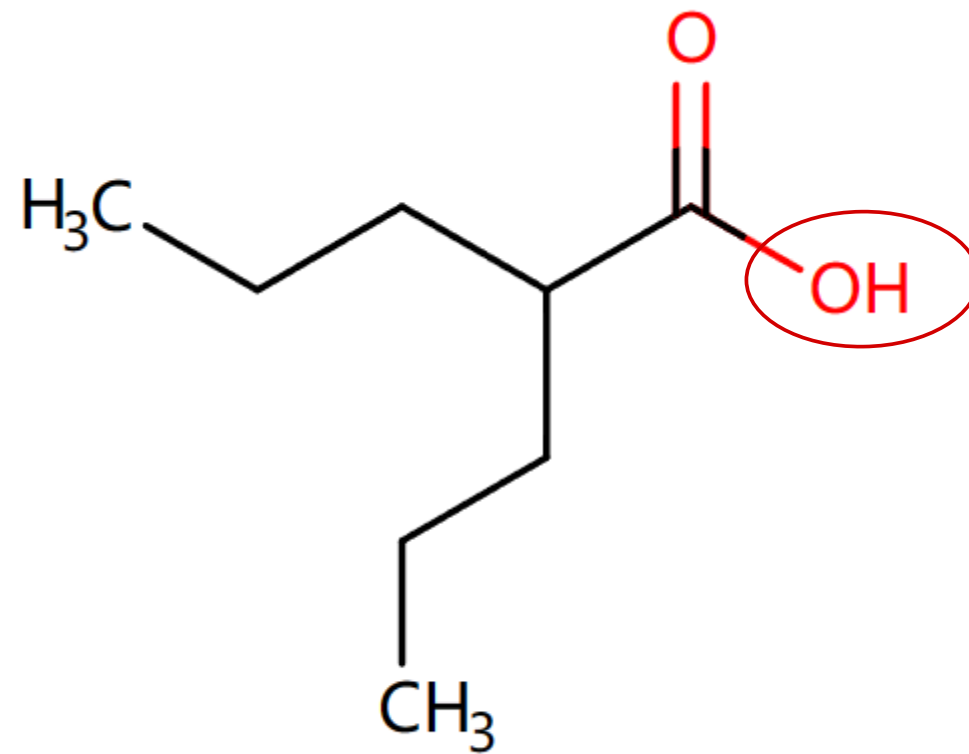

0.11

Supplement: s1 [file s1]
